# Supplementary material
Source: Springer Nature journal article supplement (https://www.springermedizin.de/resource/supplementary/12904_2010_82_MOESM2_ESM.pdf/9518066)
Supplement: MOESM2 [file 9518066]

**Example:**

1 = strongly disagree

5 = strongly agree

27. Paediatricians in their own practice should have basic knowledge in palliative care.

| 1                        | 2                        | 3                        | 4                        | 5                        |
|--------------------------|--------------------------|--------------------------|--------------------------|--------------------------|
| <input type="checkbox"/> |
